# Supplementary material for: Metabolic labeling and targeted modulation of adipocytes
Source: Royal Society of Chemistry journal article supplement (doi:10.1039/d4bm01352b), 2024-11-28
Supplement: d4bm01352b1.pdf [file d4bm01352b1.pdf]

**Supporting Information for**  
**Metabolic Labeling and Targeted Modulation of Adipocytes**

Yueji Wang<sup>1,2,#</sup>, Yang Bo<sup>1,#</sup>, Yusheng Liu<sup>1</sup>, Jiadiao Zhou<sup>1</sup>, Daniel Nguyen<sup>1</sup>, Dhyanes Baskaran<sup>1</sup>,  
Yuan Liu<sup>1</sup>, Hua Wang<sup>1,3,4,5,6,7,8\*</sup>

<sup>1</sup>Department of Materials Science and Engineering, University of Illinois at Urbana-Champaign, Urbana, IL 61801, USA. <sup>2</sup>Department of Mechanical Science and Engineering, University of Illinois at Urbana-Champaign, Urbana, IL 61801, USA. <sup>3</sup>Cancer Center at Illinois (CCIL), Urbana, IL 61801, USA. <sup>4</sup>Institute for Genomic Biology, University of Illinois at Urbana-Champaign, Urbana, IL 61801, USA. <sup>5</sup>Department of Bioengineering, University of Illinois at Urbana-Champaign, Urbana, IL 61801, USA. <sup>6</sup>Carle College of Medicine, University of Illinois at Urbana-Champaign, Urbana, IL 61801, USA. <sup>7</sup>Beckman Institute for Advanced Science and Technology, University of Illinois at Urbana-Champaign, Urbana, IL 61801, USA. <sup>8</sup>Materials Research Laboratory, University of Illinois at Urbana-Champaign, Urbana, IL 61801, USA.

<sup>#</sup>These authors contributed equally.

\*Correspondence should be addressed to huawang3@illinois.edu

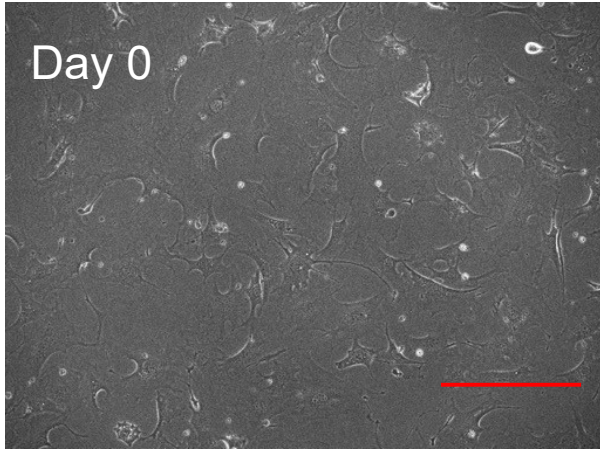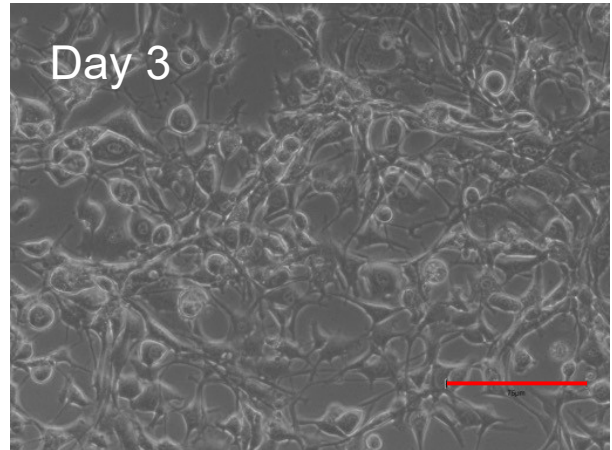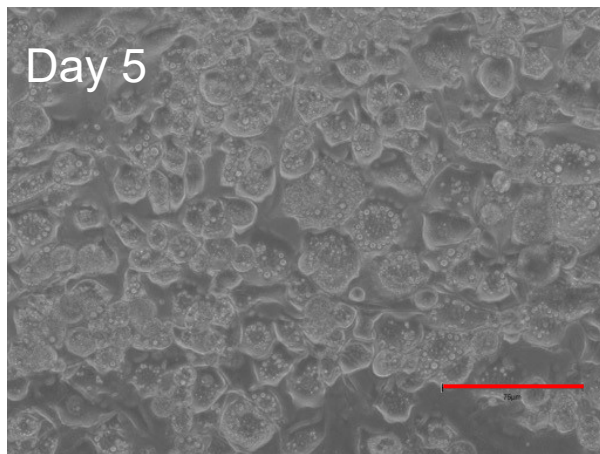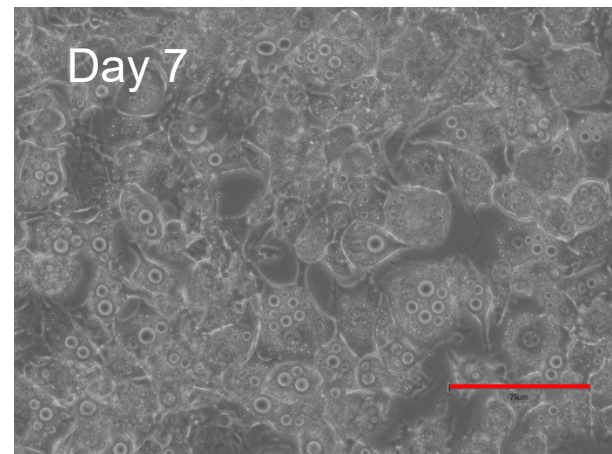

**Figure S1.** Microscopic images of 3T3-L1-differentiated adipocytes at different times of differentiation. Scale bar: 75  $\mu\text{m}$ .

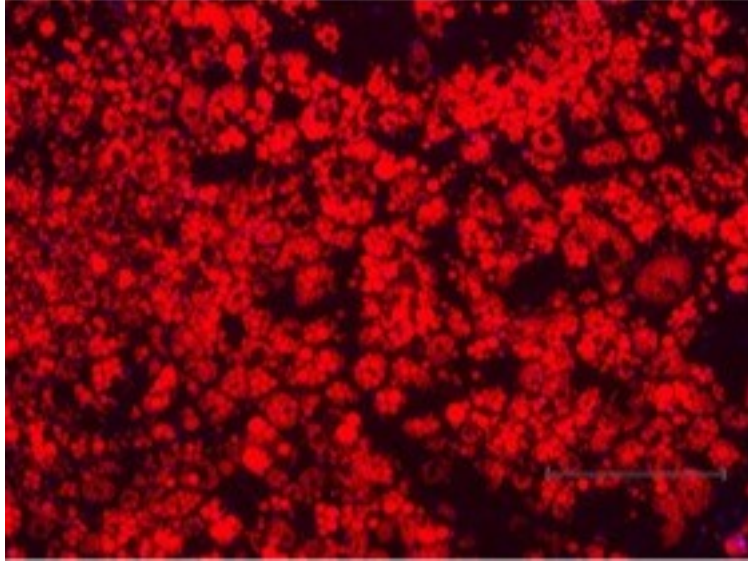

**Figure S2.** Fluorescent images of Nile Red-stained 3T3-L1-differentiated adipocytes on day 7 of differentiation. Scale bar: 300  $\mu\text{m}$ .

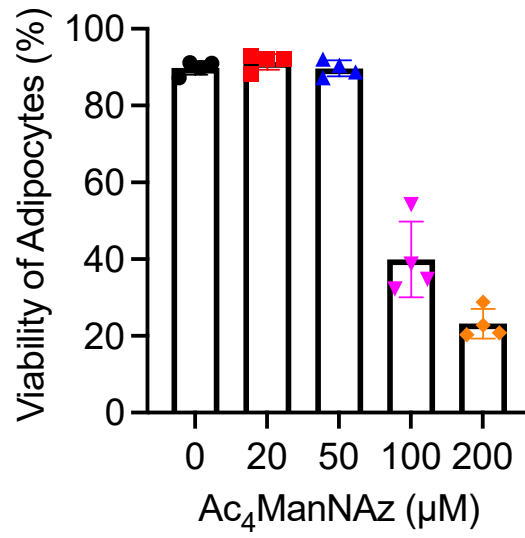

**Figure S3.** Viability of 3T3-L1-differentiated adipocytes after 3-day incubation with different concentrations of Ac<sub>4</sub>ManNAz or PBS.

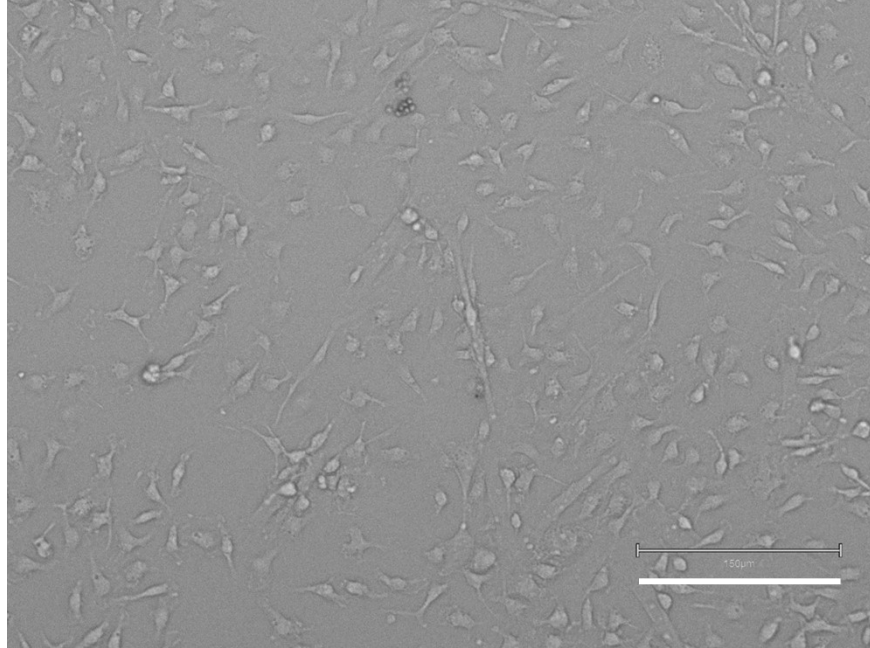

**Figure S4.** Microscopic images of bone marrow derived macrophages (BMDMs). Scale bar: 150  $\mu\text{m}$ .

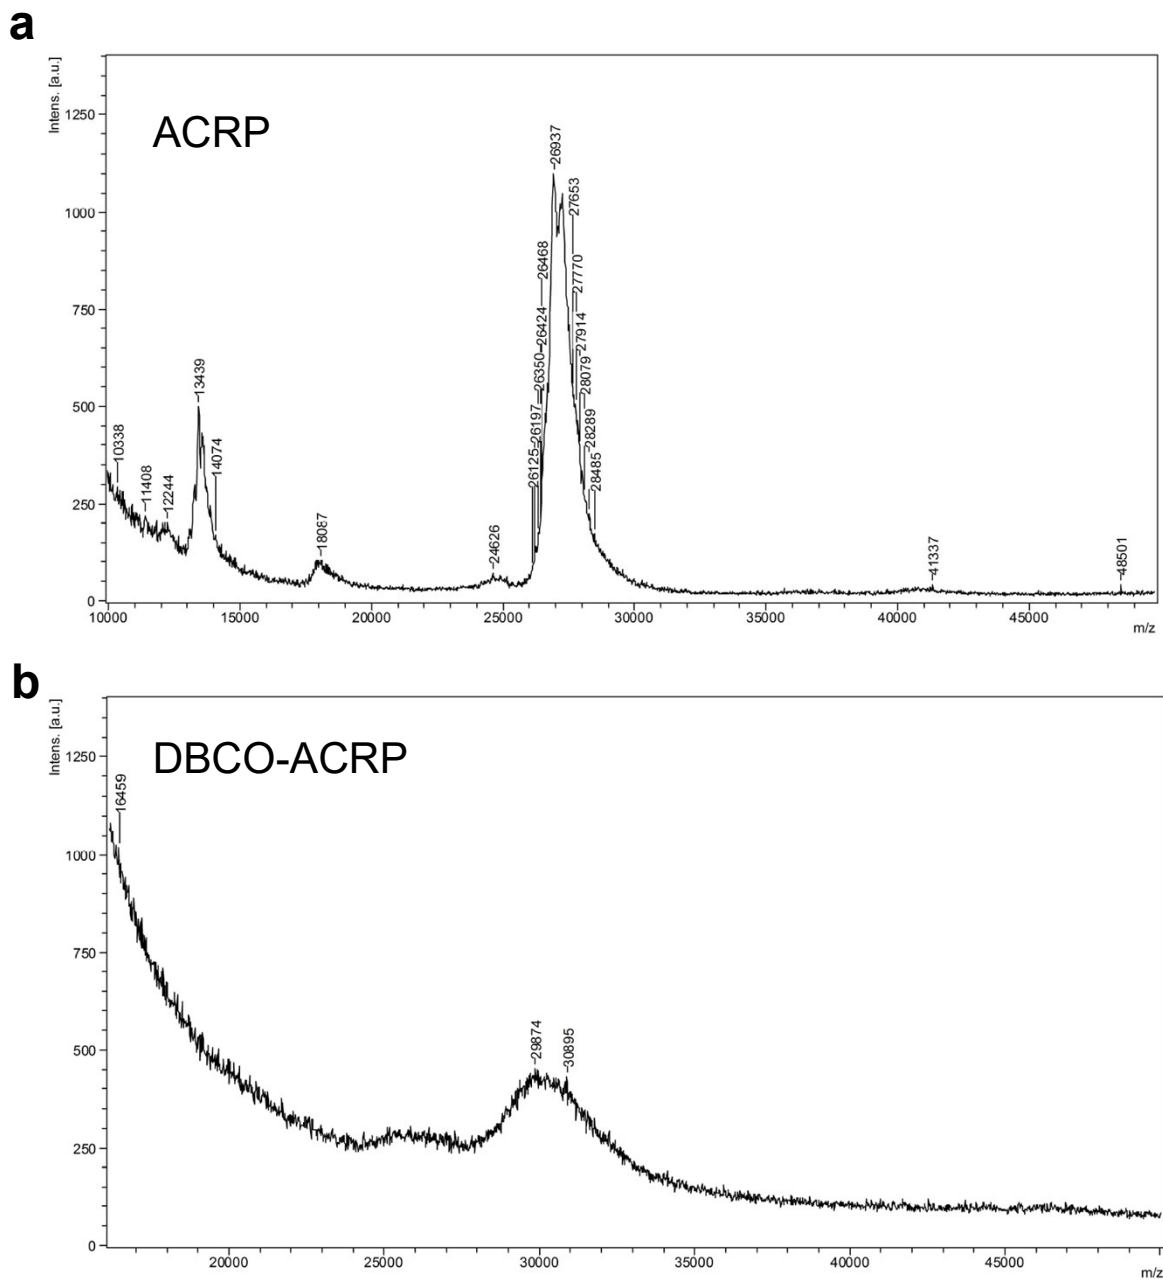

**Figure S5.** Matrix-assisted laser desorption/ionization (MALDI) spectra of (a) Adiponectin (ACRP) and (b) DBCO-ACRP.

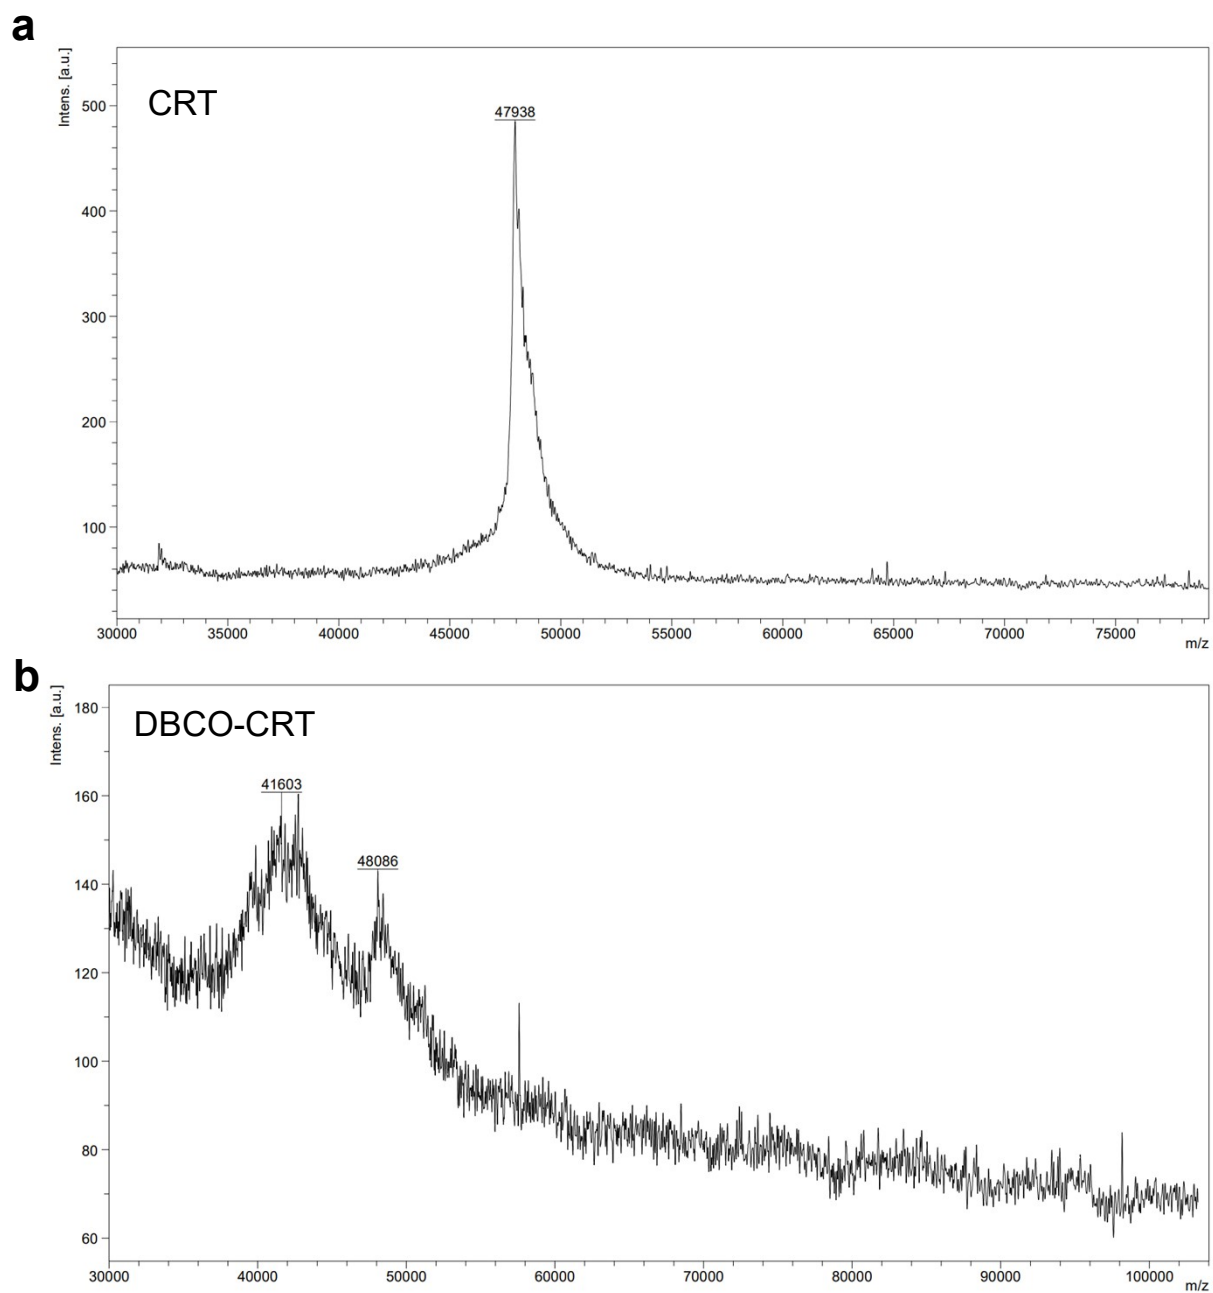

**Figure S6.** Matrix-assisted laser desorption/ionization (MALDI) spectra of (a) calreticulin (CRT) and (b) DBCO-CRT.

**a**

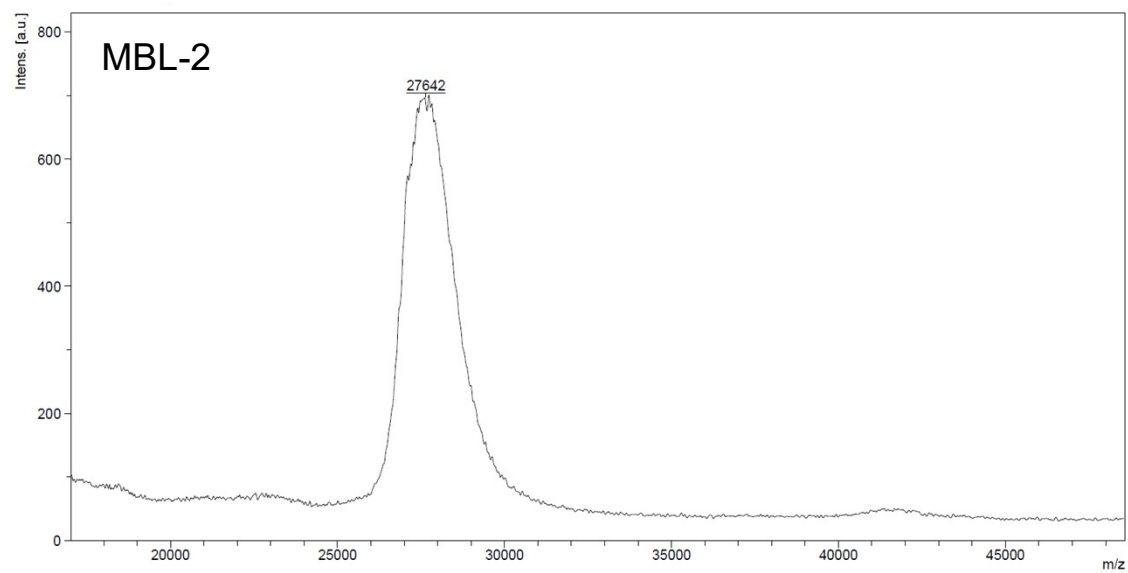

**b**

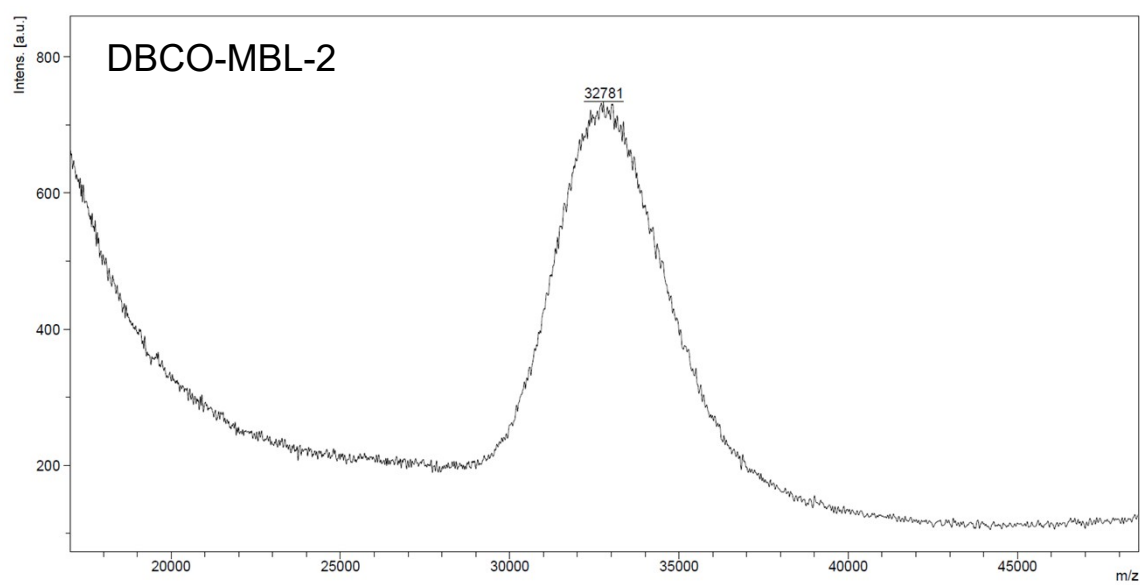

**Figure S7.** Matrix-assisted laser desorption/ionization (MALDI) spectra of (a) MBL-2 and (b) DBCO-MBL-2.



**a**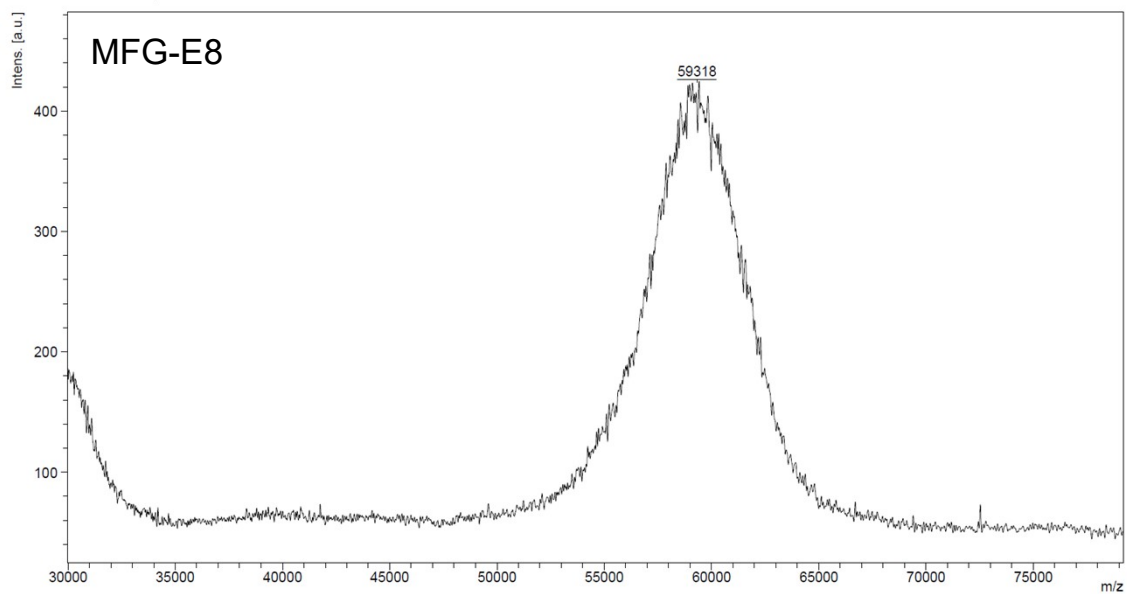**b**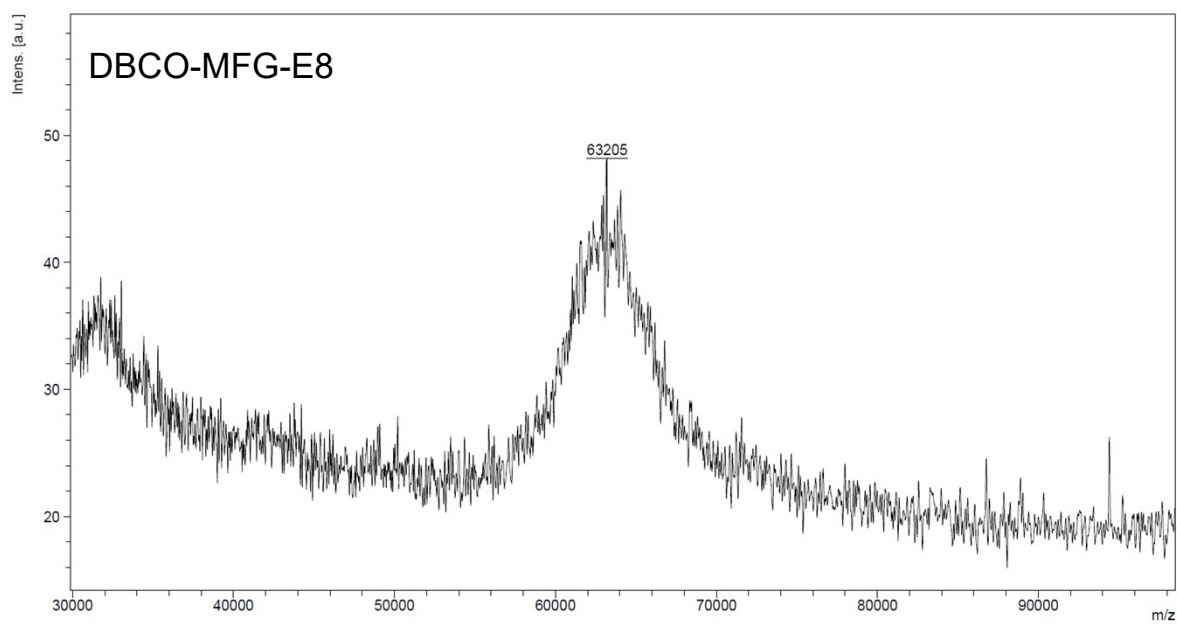

**Figure S8.** Matrix-assisted laser desorption/ionization (MALDI) spectra of (a) MFG-E8 and (b) DBCO-MFG-E8.
